# Supplementary material for: Detection of the fungicide transformation product 4-hydroxychlorothalonil in serum of pregnant women from Sweden and Costa Rica
Source: PubMed Central journal article supplement (PMC11142910; doi:10.1038/s41370-023-00580-8), 2023-07-20
Supplement: 41370_2023_580_MOESM2_ESM.pdf [file 41370_2023_580_MOESM2_ESM.pdf]

Corresponding Author name: \_\_\_\_\_

Manuscript Number: \_\_\_\_\_

**Reporting Checklist**

This checklist is used to ensure the quality, transparency, and reproducibility of published results. We require authors attest that these components have been considered and addressed.

| <b>Exposure Assessment Guiding Principle</b>                                                                                                       | <b>Yes/No/Not Applicable</b> |
|----------------------------------------------------------------------------------------------------------------------------------------------------|------------------------------|
| Has the method to estimate exposure been described clearly?                                                                                        |                              |
| Has the exposure assessment method been validated/evaluated as a proxy for exposure and is its validity or agreement with other methods described? |                              |
| Is the time period over which the exposure assessment method is considered to be a proxy for exposure appropriate for the research question?       |                              |
| If exposure is modeled or measured, were all critical potential routes and sources of exposure considered?                                         |                              |
| If exposure is modeled, how does it vary over space and time and are necessary historical data incorporated?                                       |                              |
| If biomarkers are used as indicators of exposure, could the biomarker measurement have been affected by the outcome (i.e., reverse causality)?     |                              |
| Are the strengths and weaknesses of the exposure approach detailed and discussed?                                                                  |                              |
